# Supplementary material
Source: MDPI journal article supplement (https://www.mdpi.com/2075-1702/3/4/364)
Supplement: s1 [file s1]

## Sheet: Abb. 1
Abbildung 1: Mähdrescher Weltmarkt 2004
Quelle: Neue Landwirtschaft. (verändert nach KUTSCHENREITER, Ausgabe 11, 2005)
Region	Einheiten	Anteil in %	Region	Anteil in %
Westeuropa	6820	19.4191	Western Europe	0.194191
Osteuropa	7800	22.2096	Eastern Europe	0.222096
Nordamerika	8000	22.779	North America	0.22779
Südamerika	10300	29.328	South America	0.29328
Ozeanien	1050	2.98975	Oceania	0.0298975
Asien, Afrika	1150	3.27449	Asia, Africa	0.0327449
Gesamt	35120	100	total	1

## Sheet: Abb. 2 
Inlandsabsatz der MD							Inlandsabsatz an Mähdreschern
							Domestics sales of combine harvesters
Jahr	1990	1991	1992	1993	1994	1995	1996	1997	1998	1999	2000	2001	2002	2003	2004	2005	2007	2008	ø
MD-Absatz	1890	2537	2337	1676	1759	2012	2154	2455	2678	2132	1963	1499	1966	1429	1014	1377	1388	1279	1863.61
	1890	2537	2337	1676	1759	2012	2154	2455	2678	2132	1963	1499	1966	1429	1014	1377	1350	1388	1279

## Sheet: Abb. 3
Veränderung	Jahr	1990	1991	1992	1993	1994	1995	1996	1997	1998	1999	2000	2001	2002	2003	2004	2005	2006	2007	2008
0.0514096	Altbestand	155000	147032	139473	132302	125501	119049	112929	107123	101616	96391.8	91436.4	86735.7	82276.6	78046.8	74034.5	70228.4	66618	63193.2	59944.4
	1990	1890	1890	1890	1890	1890	1890	1890	1890	1890	1890	1512	907.2	362.88	72.576	0
0.1	1991		2537	2537	2537	2537	2537	2537	2537	2537	2537	2537	2029.6	1217.76	487.104	97.4208	0
0.125	1992			2337	2337	2337	2337	2337	2337	2337	2337	2337	2337	1869.6	1121.76	448.704	89.7408	0
	1993				1676	1676	1676	1676	1676	1676	1676	1676	1676	1676	1340.8	804.48	321.792	64.3584	0
	1994					1759	1759	1759	1759	1759	1759	1759	1759	1759	1759	1407.2	844.32	337.728	67.5456	0
	1995						2012	2012	2012	2012	2012	2012	2012	2012	2012	2012	1609.6	965.76	386.304	77.2608
	1996							2154	2154	2154	2154	2154	2154	2154	2154	2154	2154	1723.2	1033.92	413.568
	1997								2455	2455	2455	2455	2455	2455	2455	2455	2455	2455	1964	1178.4
	1998									2678	2678	2678	2678	2678	2678	2678	2678	2678	2678	2142.4
	1999										2132	2132	2132	2132	2132	2132	2132	2132	2132	2132
	2000											1963	1963	1963	1963	1963	1963	1963	1963	1963
	2001												1499	1499	1499	1499	1499	1499	1499	1499
	2002													1966	1966	1966	1966	1966	1966	1966
	2003														1429	1429	1429	1429	1429	1429
	2004															1014	1014	1014	1014	1014
	2005																1377	1377	1377	1377
	2006																	1350	1350	1350
	2007																		1388	1388
	2008																			1279

## Sheet: Abb. 6
	Berechnung Mähdrescher
	Bestand nach Statistischem Jahrbuch
		1980	1990	1991	1992	1993	1994	1995	1996	1997	1998	1999	2000	2001	2002	2003	2004	2005	2006
		151300	123200	106700	116000	135800	135800	135800	135800	135800	135800	135800	135800	135000	135000	135000	135000	135000	135000
	Nach FAO
		1990	1991	1992	1993	1994	1995	1996	1997	1998	1999	2000	2001	2002	2003	2004	2005	2006	2007
		155000	141200	140000	135782	135000	135000	130109	127358	119441	114752	110318	105899	101480	101116	97167	93068	89172	85480
Domestics sales of combine harvesters	Inlandsabsatz Mähdrescher
		1990	1991	1992	1993	1994	1995	1996	1997	1998	1999	2000	2001	2002	2003	2004	2005	2006	2007	2008	2009	2010	2011	2012	2013	2014	2015	2016	2017	2018	2019	2020	2021	2022
		1890	2537	2337	1676	1759	2012	2154	2455	2678	2132	1963	1499	1966	1429	1014	1377	1350	1388	1279	1282.73	1227.01	1171.32	1115.66	1060.03	1004.42	948.842	893.291	837.767	782.272	726.803	2128.9	2881.91	2749.2
	Nutzungsdauer:	1	2	3	4	5	6	7	8	9	10	11	12	13	14	15
	Restbestand	1	1	1	1	1	1	1	1	1	1	0.8	0.6	0.4	0.2	0
		1	1	1	1	1	1	1	1	0.8	0.6	0.4	0.2	0
	Old stocks
Veränderung	Jahr	1990	1991	1992	1993	1994	1995	1996	1997	1998	1999	2000	2001	2002	2003	2004	2005	2006	2007	2008	2009	2010	2011	2012	2013	2014	2015	2016	2017	2018	2019	2020	2021	2022
0.0514096	Altbestand	155000	147032	139473	132302	125501	119049	112929	107123	101616	96391.8	91436.4	86735.7	82276.6	78046.8	74034.5	70228.4	66618	63193.2	59944.4	56862.7	53939.4	51166.4	48536	46040.8	43673.8	41428.6	39298.7	37278.4	35361.9	33544	31819.5	30183.7	28632
	1990	1890	1890	1890	1890	1890	1890	1890	1890	1890	1890	1512	907.2	362.88	72.576	0
0.1	1991		2537	2537	2537	2537	2537	2537	2537	2537	2537	2537	2029.6	1217.76	487.104	97.4208	0
0.125	1992			2337	2337	2337	2337	2337	2337	2337	2337	2337	2337	1869.6	1121.76	448.704	89.7408	0
	1993				1676	1676	1676	1676	1676	1676	1676	1676	1676	1676	1340.8	804.48	321.792	64.3584	0
	1994					1759	1759	1759	1759	1759	1759	1759	1759	1759	1759	1407.2	844.32	337.728	67.5456	0
	1995						2012	2012	2012	2012	2012	2012	2012	2012	2012	2012	1609.6	965.76	386.304	77.2608	0
	1996							2154	2154	2154	2154	2154	2154	2154	2154	2154	2154	1723.2	1033.92	413.568	82.7136	0
	1997								2455	2455	2455	2455	2455	2455	2455	2455	2455	2455	1964	1178.4	471.36	94.272	0
	1998									2678	2678	2678	2678	2678	2678	2678	2678	2678	2678	2142.4	1285.44	514.176	102.835	0
	1999										2132	2132	2132	2132	2132	2132	2132	2132	2132	2132	1705.6	1023.36	409.344	81.8688	0
	2000											1963	1963	1963	1963	1963	1963	1963	1963	1963	1963	1570.4	942.24	376.896	75.3792	0
	2001												1499	1499	1499	1499	1499	1499	1499	1499	1499	1499	1199.2	719.52	287.808	57.5616	0
	2002													1966	1966	1966	1966	1966	1966	1966	1966	1966	1966	1572.8	943.68	377.472	75.4944	0
	2003														1429	1429	1429	1429	1429	1429	1429	1429	1429	1429	1143.2	685.92	274.368	54.8736	0
	2004															1014	1014	1014	1014	1014	1014	1014	1014	1014	1014	811.2	486.72	194.688	38.9376	0
	2005																1377	1377	1377	1377	1377	1377	1377	1377	1377	1377	1101.6	660.96	264.384	52.8768	0
	2006																	1350	1350	1350	1350	1350	1350	1350	1350	1350	1350	1080	648	259.2	51.84	0	0	0
	2007																		1388	1388	1388	1388	1388	1388	1388	1388	1388	1388	1110.4	666.24	266.496	53.2992	0	0
	2008																			1279	1279	1279	1279	1279	1279	1279	1279	1279	1279	1023.2	613.92	245.568	49.1136	0
	2009																				1282.73	1282.73	1282.73	1282.73	1282.73	1282.73	1282.73	1282.73	1282.73	1282.73	1026.18	615.709	246.284	49.2567
	2010																					1227.01	1227.01	1227.01	1227.01	1227.01	1227.01	1227.01	1227.01	1227.01	1227.01	981.608	588.965	235.586
	2011																						1171.32	1171.32	1171.32	1171.32	1171.32	1171.32	1171.32	1171.32	1171.32	1171.32	937.057	562.234
	2012																							1115.66	1115.66	1115.66	1115.66	1115.66	1115.66	1115.66	1115.66	1115.66	1115.66	892.528
	2013																								1060.03	1060.03	1060.03	1060.03	1060.03	1060.03	1060.03	1060.03	1060.03	1060.03
	2014																									1004.42	1004.42	1004.42	1004.42	1004.42	1004.42	1004.42	1004.42	1004.42
	2015																										948.842	948.842	948.842	948.842	948.842	948.842	948.842	948.842
	2016																											893.291	893.291	893.291	893.291	893.291	893.291	893.291
	2017																												837.767	837.767	837.767	837.767	837.767	837.767
	2018																													782.272	782.272	782.272	782.272	782.272
	2019																														726.803	726.803	726.803	726.803
	2020																															2128.9	2128.9	2128.9
	2021																																2881.91	2881.91
	2022																																	2749.2
	2023																																		0
	2024																																			0
	2025																																				0
	2026																																					0
	2027																																						0
	2028
	2029
	2030
Inventory	Gesamtbestand	156890	151459	146237	140742	135700	131260	127294	123943	121114	118022	114651	110337	106021	101116	96094.3	91760.8	87572	83440.9	79153.1	74955.5	70953.4	67304.1	63920.8	60755.6	57861.1	55193.8	52659.6	50160.2	47686.8	45269.8	44385	44385	44385
	Summe laut Prognose																															42256.1	41503.1	41635.8
	Ziel Mindestbestand (Simulation)																															44385	44385	44385
	Minimum stock	155000	141200	140000	135782	135000	135000	130109	127358	119441	114752	110318	105899	101480	101116	97167	93068	89172	85480
Summe
58290.4	Differrenz (abs)	1890	10258.5	6236.68	4960.45	699.832	3740.11	2815.37	3414.99	1672.86	3269.83	4333.37	4438.46	4540.86	0.0484626	1072.74	1307.17	1599.99	2039.07											44385
																														0	884.843
																					1004.56

## Sheet: Abb. 7
	Berechnung Mähdrescher
	Mähdrescherbestand in Deutschland nach FAO
	Jahr	1990	1991	1992	1993	1994	1995	1996	1997	1998	1999	2000	2001	2002	2003	2004	2005	2006	2007
	Anzahl	155000	141200	140000	135782	135000	135000	130109	127358	119441	114752	110318	105899	101480	101116	97167	93068	89172	85480
	Mähdrescherinlandsabsatz	Nach Statistischen Jahrbüchern
	Jahr	1990	1991	1992	1993	1994	1995	1996	1997	1998	1999	2000	2001	2002	2003	2004	2005	2006	2007	2008
	Anzahl	1890	2537	2337	1676	1759	2012	2154	2455	2678	2132	1963	1499	1966	1429	1014	1377	1350	1388	1279
	Inlandsabsatz nach der Regressionsanalyse auf dem Absatz basiernd
	Jahr	2009	2010	2011	2012	2013	2014	2015	2016	2017	2018	2019
	Anzahl	1282.73	1227.01	1171.32	1115.66	1060.03	1004.42	948.842	893.291	837.767	782.272	2377
	Inlandsabsatz nach @Risk
	Jahr	2020	2021	2022	2023	2024	2025	2026	2027	2028	2029	2030
	Anzahl	2922.27	2779.91	2640.17	2504.77	2373.51	2246.16	2122.53	2332.47	2863.92	3400.44	3671.66
	Nutzungsdauer in Jahren:	1	2	3	4	5	6	7	8	9	10	11	12	13	14	15
	Neubestand bis 2009	1	1	1	1	1	1	1	1	1	1	0.8	0.6	0.4	0.2	0
	Neubestand ab 2009	1	1	1	1	1	1	1	1	0.8	0.6	0.4	0.2	0	0	0
Veränderung	Jahr	1990	1991	1992	1993	1994	1995	1996	1997	1998	1999	2000	2001	2002	2003	2004	2005	2006	2007	2008	2009	2010	2011	2012	2013	2014	2015	2016	2017	2018	2019	2020	2021	2022	2023	2024	2025	2026	2027	2028	2029	2030
0.0514096	Altbestand	155000	147032	139473	132302	125501	119049	112929	107123	101616	96391.8	91436.4	86735.7	82276.6	78046.8	74034.5	70228.4	66618	63193.2	59944.4	56862.7	53939.4	51166.4	48536	46040.8	43673.8	41428.6	39298.7	37278.4	35361.9	33544	31819.5	30183.7	28632	27160	25763.7	24439.2	23182.8	21991	20860.4	19788	18770.7
	1990	1890	1890	1890	1890	1890	1890	1890	1890	1890	1890	1512	907.2	362.88	72.576	0
	1991		2537	2537	2537	2537	2537	2537	2537	2537	2537	2537	2029.6	1217.76	487.104	97.4208	0
	1992			2337	2337	2337	2337	2337	2337	2337	2337	2337	2337	1869.6	1121.76	448.704	89.7408	0
	1993				1676	1676	1676	1676	1676	1676	1676	1676	1676	1676	1340.8	804.48	321.792	64.3584	0
	1994					1759	1759	1759	1759	1759	1759	1759	1759	1759	1759	1407.2	844.32	337.728	67.5456	0
	1995						2012	2012	2012	2012	2012	2012	2012	2012	2012	2012	1609.6	965.76	386.304	77.2608	0
	1996							2154	2154	2154	2154	2154	2154	2154	2154	2154	2154	1723.2	1033.92	413.568	82.7136	0
	1997								2455	2455	2455	2455	2455	2455	2455	2455	2455	2455	1964	1178.4	471.36	94.272	0
	1998									2678	2678	2678	2678	2678	2678	2678	2678	2678	2678	2142.4	1285.44	514.176	102.835	0
	1999										2132	2132	2132	2132	2132	2132	2132	2132	2132	2132	1705.6	1023.36	409.344	81.8688	0
	2000											1963	1963	1963	1963	1963	1963	1963	1963	1963	1963	1570.4	942.24	376.896	75.3792	0
	2001												1499	1499	1499	1499	1499	1499	1499	1499	1499	1499	1199.2	719.52	287.808	57.5616	0
0.125	2002													1966	1966	1966	1966	1966	1966	1966	1966	1572.8	943.68	377.472	75.4944	0
	2003														1429	1429	1429	1429	1429	1429	1429	1429	1143.2	685.92	274.368	54.8736	0
	2004															1014	1014	1014	1014	1014	1014	1014	1014	811.2	486.72	194.688	38.9376	0
	2005																1377	1377	1377	1377	1377	1377	1377	1377	1101.6	660.96	264.384	52.8768	0
	2006																	1350	1350	1350	1350	1350	1350	1350	1350	1080	648	259.2	51.84	0
	2007																		1388	1388	1388	1388	1388	1388	1388	1388	1110.4	666.24	266.496	53.2992	0
	2008																			1279	1279	1279	1279	1279	1279	1279	1279	1023.2	613.92	245.568	49.1136	0
	2009																				1282.73	1282.73	1282.73	1282.73	1282.73	1282.73	1282.73	1282.73	1026.18	615.709	246.284	49.2567	0
	2010																					1227.01	1227.01	1227.01	1227.01	1227.01	1227.01	1227.01	1227.01	981.608	588.965	235.586	47.1172	0
	2011																						1171.32	1171.32	1171.32	1171.32	1171.32	1171.32	1171.32	1171.32	937.057	562.234	224.894	44.9787	0
	2012																							1115.66	1115.66	1115.66	1115.66	1115.66	1115.66	1115.66	1115.66	892.528	535.517	214.207	42.8413	0
	2013																								1060.03	1060.03	1060.03	1060.03	1060.03	1060.03	1060.03	1060.03	848.021	508.812	203.525	40.705	0
	2014																									1004.42	1004.42	1004.42	1004.42	1004.42	1004.42	1004.42	1004.42	803.536	482.122	192.849	38.5697	0
	2015																										948.842	948.842	948.842	948.842	948.842	948.842	948.842	948.842	759.073	455.444	182.178	36.4355	0
	2016																											893.291	893.291	893.291	893.291	893.291	893.291	893.291	893.291	714.633	428.78	171.512	34.3024	0
	2017																												837.767	837.767	837.767	837.767	837.767	837.767	837.767	837.767	670.214	402.128	160.851	32.1703	0
	2018																													782.272	782.272	782.272	782.272	782.272	782.272	782.272	782.272	625.817	375.49	150.196	30.0392	0
	2019																														2377	2377	2377	2377	2377	2377	2377	2377	1901.6	1140.96	456.384	91.2768
	2020																															2922.27	2922.27	2922.27	2922.27	2922.27	2922.27	2922.27	2922.27	2337.81	1402.69	561.075
	2021																																2779.91	2779.91	2779.91	2779.91	2779.91	2779.91	2779.91	2779.91	2223.93	1334.36
	2022																																	2640.17	2640.17	2640.17	2640.17	2640.17	2640.17	2640.17	2640.17	2112.13
	2023																																		2504.77	2504.77	2504.77	2504.77	2504.77	2504.77	2504.77	2504.77
	2024																																			2373.51	2373.51	2373.51	2373.51	2373.51	2373.51	2373.51
	2025																																				2246.16	2246.16	2246.16	2246.16	2246.16	2246.16
	2026																																					2122.53	2122.53	2122.53	2122.53	2122.53
	2027																																						2332.47	2332.47	2332.47	2332.47
	2028																																							2863.92	2863.92	2863.92
	2029																																								3400.44	3400.44
	2030																																									3671.66
	Summe (Altbestand + Absatz)	156890	151459	146237	140742	135700	131260	127294	123943	121114	118022	114651	110337	106021	101116	96094.3	91760.8	87572	83440.9	79153.1	74955.5	70560.2	65996	61779.6	58215.9	55250.1	52579.3	50003.5	47495.2	45071.7	44384.7	44385	44385	44385	44385	44385	44385	44385	44385	44385	44385	44385
																																41462.7	41605.1	41744.8	41880.2	42011.5	42138.8	42262.5	42052.5	41521.1	40984.6	40713.3
	Ziel Mindestbestand (@RISK)																															44385	44385	44385	44385	44385	44385	44385	44385	44385	44385	44385
